# Supplementary material for: MRG-1, an autosome-associated protein, silences X-linked genes and protects germline immortality inCaenorhabditis elegans
Source: Oxford University Press journal article supplement (doi:10.1242/dev.02771), 2007-01-11
Supplement: dev02771tables1.pdf [file dev02771tables1.pdf]

**Table S1. Number of germ nuclei during larval development**

| Genotype      | 25 hour <sup>a</sup> |      |       | 31 hour <sup>a</sup> |      |       | 40 hour <sup>a</sup> |      |        | 50 hour <sup>a</sup> |      |         |
|---------------|----------------------|------|-------|----------------------|------|-------|----------------------|------|--------|----------------------|------|---------|
|               | n                    | Mean | Range | n                    | Mean | Range | n                    | Mean | Range  | n                    | Mean | Range   |
| N2            | 11                   | 15   | 8-18  | 11                   | 23   | 14-33 | 11                   | 121  | 40-159 | 3                    | 285  | 196-337 |
| <i>qa6200</i> | 16                   | 3    | 2-6   | 12                   | 6    | 2-8   | 4                    | 5    | 2-8    | 9                    | 1    | 0-3     |
| <i>tm1227</i> | 18                   | 3    | 2-5   | 6                    | 3    | 2-4   | 6                    | 3    | 2-6    | 9                    | 3    | 0-7     |

Germ nuclei were counted in intact wild-type and *mrg-1* M-Z- larvae fixed in methanol/acetone (Strome and Wood, 1983) and stained with DAPI and anti-PGL-1 to mark germline-specific P granules.

<sup>a</sup>Hours after hatching at 20°C.
